# Supplementary material for: Optimization of a nanoparticle uptake protocol applied to amniotic-derived cells: unlocking the therapeutic potential
Source: Royal Society of Chemistry journal article supplement (doi:10.1039/d4tb00607k), 2024-01-01
Supplement: d4tb00607k1.pdf [file d4tb00607k1.pdf]

## Supplementary information.

### Optimization of Nanoparticle Uptake Protocol applied to Amniotic-Derived Cells: Unlocking the Therapeutic Potential

Alessia Peserico,<sup>\*a</sup> Angelo Canciello,<sup>a</sup> Giuseppe Prencipe,<sup>a</sup> Roberto Gramignoli,<sup>b</sup> Valeria Melai,<sup>c</sup> Giampiero Scortichini,<sup>c</sup> Mirella Bellocci,<sup>c</sup> Giulia Capacchietti,<sup>a</sup> Maura Turriani,<sup>a</sup> Chiara Di Pancrazio,<sup>c</sup> Paolo Berardinelli,<sup>a</sup> Valentina Russo,<sup>a</sup> Mauro Mattioli,<sup>a</sup> Barbara Barboni.<sup>a</sup>

\* Corresponding author

<sup>a</sup> Department of Bioscience and Technology for Food, Agriculture and Environment, University of Teramo, 64100 Teramo, Italy

<sup>b</sup> Department of Laboratory Medicine, Karolinska Institute, Stockholm, Sweden.

<sup>c</sup> Istituto Zooprofilattico Sperimentale dell'Abruzzo e Molise 'G. Caporale', Campo Boario, 64100 Teramo, Italy.

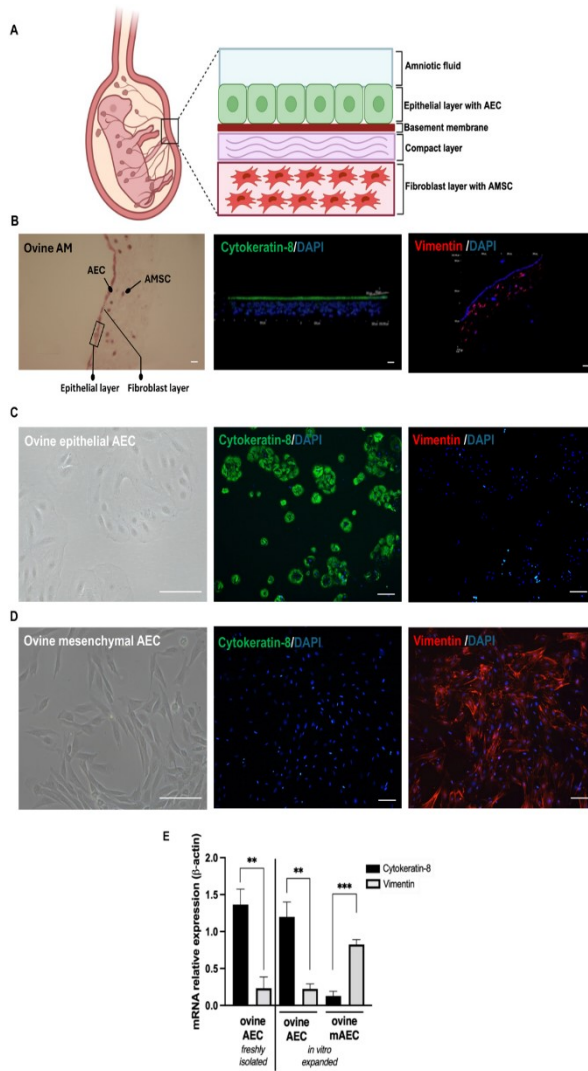

**Supplementary Figure 1. Phenotypic characterization of Amniotic-derived cells.** Immunofluorescence analysis for Cytokeratin-8 and Vimentin in AM and expanded AECs. **(A)** Schematic representation of fetal membrane epithelial and mesenchymal layers. **(B)** Freshly isolated ovine AM, processed through immunofluorescence analysis using Cytokeratin-8 (an epithelial marker) and Vimentin (a mesenchymal marker), and imaged with phase-contrast microscopy, demonstrated the specificity of the two markers for the cells located in the fibroblast layer (Vimentin: red fluorescence) where mesenchymal stromal cells are located and for the cells located in the epithelial layer (Cytokeratin-8: green). Scale Bar: 50  $\mu$ m. **(C)** Phenotypic characterization of isolated and in vitro amplified ovine AECs after three passages of expansion carried out with  $P_4$  supplementation (AECs) or **(D)** without  $P_4$  to obtain the mesenchymal phenotype (mAECs). Scale Bars for both: 50  $\mu$ m. **(E)** Real-time qPCR related to Cytokeratin-8 and Vimentin mRNA expression in ovine AECs and mAECs. Significant changes were represented with \*\* for  $p < 0.01$  or \*\*\* for  $p < 0.0001$ .

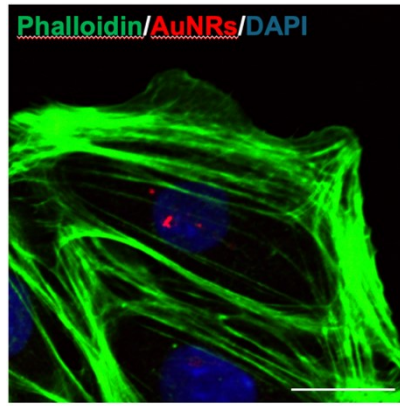

**Supplementary Figure 2. Evaluation of AuNRs Internalization into AECs through Confocal Laser Scanning.** A representative CLSM at 100x magnification (with oil) of mAECs after 24 hours of  $4.4 \mu\text{g mL}^{-1}$  AuNRs uptake with one-step cultural strategy was selected. Positive cells are shown in red due to the functionalization of the AuNRs with *rhodamine dye*, phalloidin which topologically identifies cell boundaries was stained in green, nuclei were stained with DAPI (blue). The identical scenario is evident across various time points when employing the two-step culture strategy. Scale bar:  $10 \mu\text{m}$ .

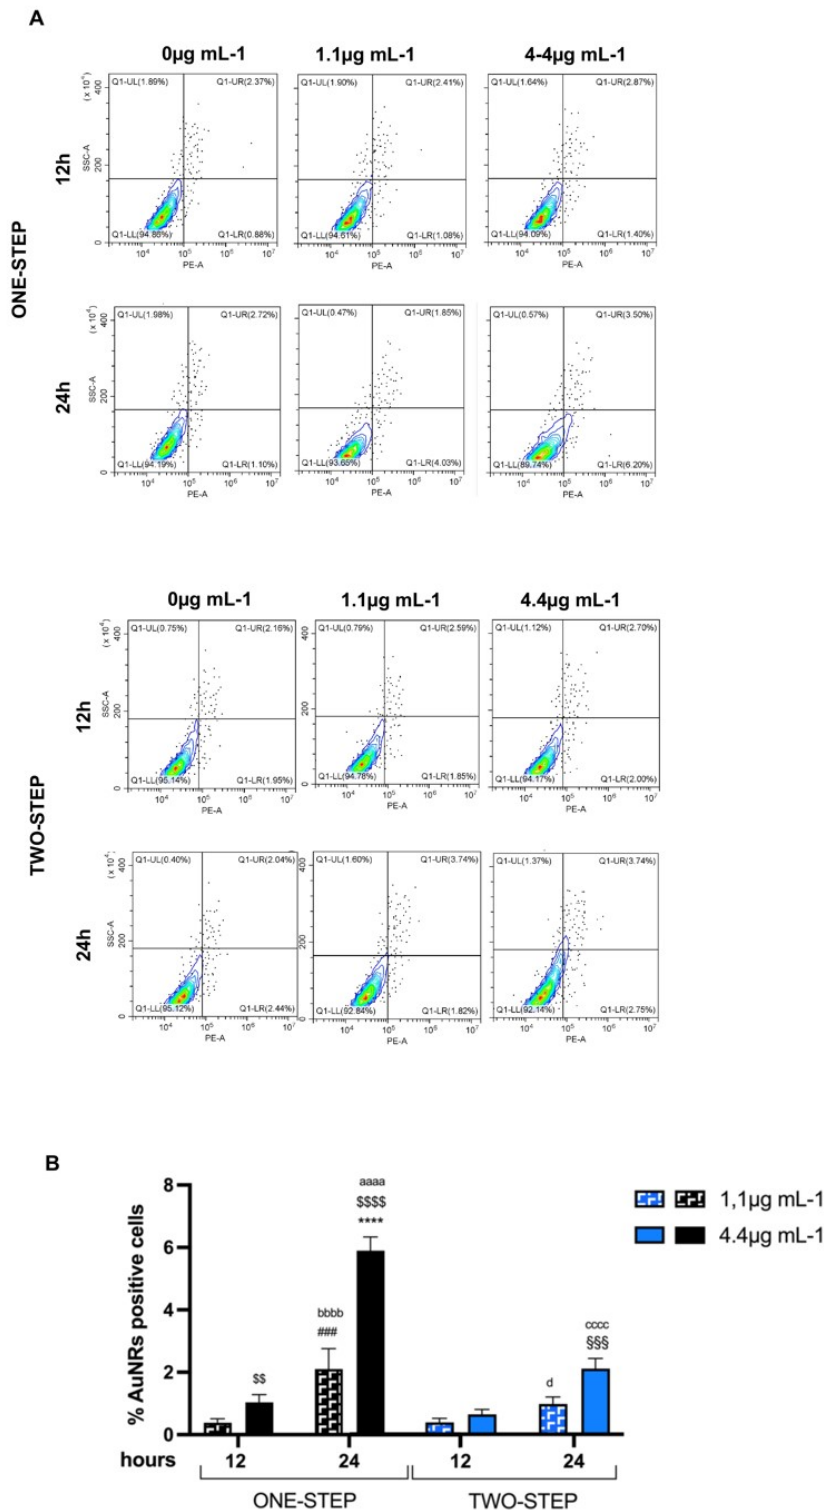

**Supplementary Figure 3. Percentage of AuNRs uptake with different incubation concentration of AuNRs ( 4.4  $\mu\text{g mL}^{-1}$  and 1.1  $\mu\text{g mL}^{-1}$ ), incubation time window (12h-24h) and cultural strategies (one-step and two-step). (A) Percentage of mAECs enclosing AuNRs were measured by PE intensity (x-axis) and side scattering (SSC; y-axis) flow cytometry dot plot. (B) Average % values related to the positive cells detected by flow cytometry. The significance of data was statistically analyzed as follow. One-step 4.4  $\mu\text{g mL}^{-1}$  vs. two-step 4.4  $\mu\text{g mL}^{-1}$  was indicated with \*\*\*\* for  $p < 0.0001$ ; One-step 1.1  $\mu\text{g mL}^{-1}$  vs. two-step 1.1  $\mu\text{g mL}^{-1}$  was indicated with ### for  $p < 0.001$ ; One-step 4.4  $\mu\text{g mL}^{-1}$  vs. One-step 1.1  $\mu\text{g mL}^{-1}$  was indicated with <sup>SS</sup> or <sup>SSSS</sup> for  $p < 0.001$  and  $p < 0.0001$ ; Two-step 4.4  $\mu\text{g mL}^{-1}$  vs. Two-step 1.1  $\mu\text{g mL}^{-1}$  was indicated with <sup>SSS</sup> for  $p < 0.001$ . One-step 24h with 4.4  $\mu\text{g mL}^{-1}$  vs. One-step 12h with 4.4  $\mu\text{g mL}^{-1}$  was indicated with <sup>aaaa</sup> for  $p < 0.0001$ ; One-step 24h with 1.1  $\mu\text{g mL}^{-1}$  vs. One-step 12h with 1.1  $\mu\text{g mL}^{-1}$  was indicated with <sup>bbbb</sup> for  $p < 0.0001$ ; Two-step 24h with 4.4  $\mu\text{g mL}^{-1}$  vs. Two-step 12h with 4.4  $\mu\text{g mL}^{-1}$  was indicated with <sup>cccc</sup> for  $p < 0.0001$ ; Two-step 24h with 1.1  $\mu\text{g mL}^{-1}$  vs. Two-step 12h with 1.1  $\mu\text{g mL}^{-1}$  was indicated with <sup>d</sup> for  $p < 0.05$**

**ONE-STEP + G-Force + Mitochondria (24h)**

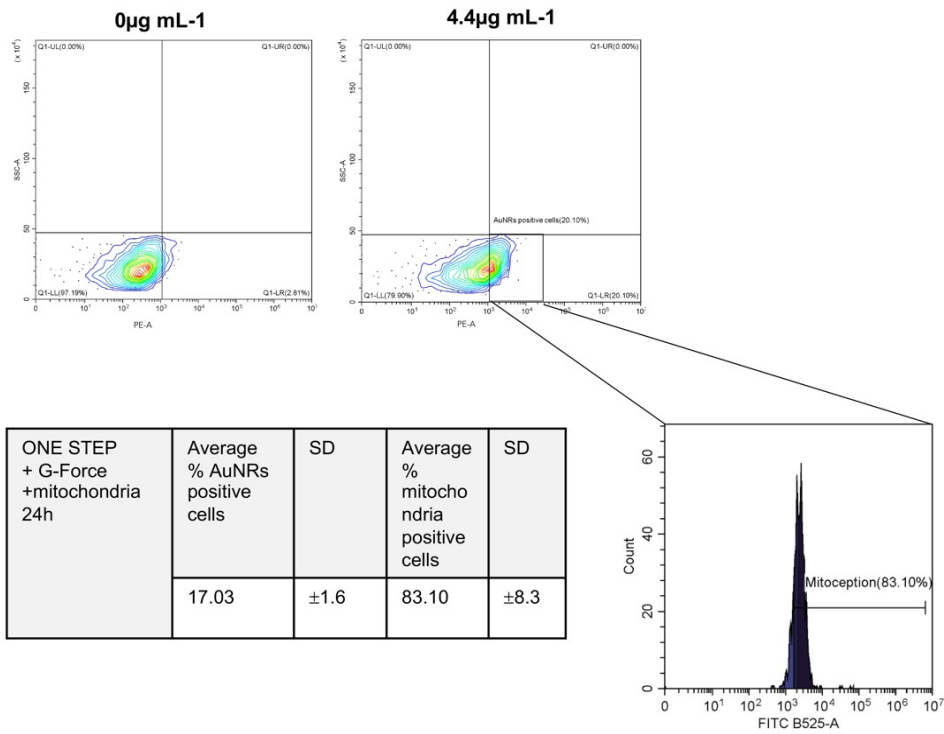

**Supplementary Figure 4. Mitochondria incorporation into AuNRs positive mAECs following one-step protocol with G-force and mitochondria supplementation.** Panels show representative flow cytometer plots for mAECs exposed 24h to 0 μg mL<sup>-1</sup> or 4.4 μg mL<sup>-1</sup> with one-step + G-force + mitochondria. The table reports the average % values ± SD related to the AuNRs and mitochondria positive mAECs detected by flow cytometry.

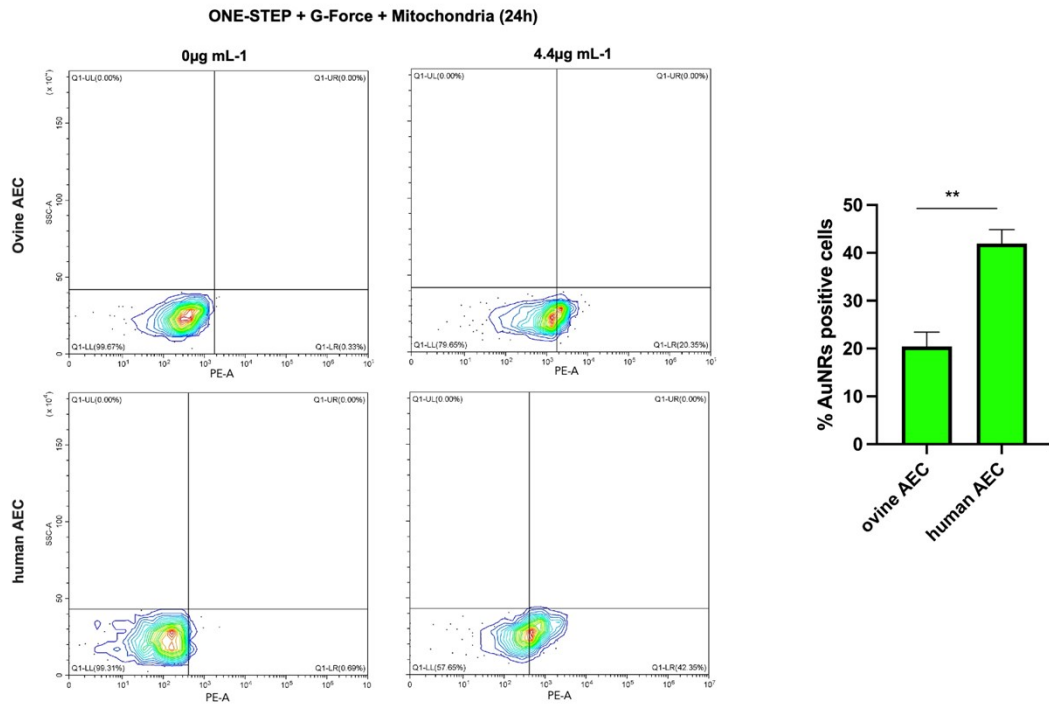

**Supplementary Figure 5. AuNRs labeling stability over time in ovine and human AECs.** Representative flow cytometer plots showing the %  $\pm$ SD of positive AuNRs AECs of ovine and human origin. Statistic related to AuNRs positive cell percentage was indicated with \* for  $p < 0.05$
